1 Comparative analysis of chemical cross-linking mass  
2 spectrometry data indicates that protein STY residues rarely  
3 react with N-hydroxysuccinimide ester cross-linkers

4 Yong Cao<sup>1\*</sup>, Xin-Tong Liu<sup>1</sup>, Peng-Zhi Mao<sup>2,3</sup>, Ching Tarn<sup>2,3</sup>, Meng-Qiu Dong<sup>1,4\*</sup>

5 <sup>1</sup> National Institute of Biological Sciences, Beijing, 102206, Beijing, China

6 <sup>2</sup> Key Laboratory of Intelligent Information Processing of Chinese Academy of  
7 Sciences (CAS), Institute of Computing Technology, CAS, 100190, Beijing, China

8 <sup>3</sup> University of Chinese Academy of Sciences, 100049 Beijing, China

9 <sup>4</sup> Tsinghua Institute of Multidisciplinary Biomedical Research, Tsinghua University,  
10 102206, Beijing, China

11  
12 To whom correspondence should be addressed:

13 Y. C. (E-mail: [caoyong@nibs.ac.cn](mailto:caoyong@nibs.ac.cn))

14 M.-Q. D. (E-mail: [dongmengqiu@nibs.ac.cn](mailto:dongmengqiu@nibs.ac.cn))

15 **Abstract**

16 Chemical cross-linking of proteins coupled with mass spectrometry (CXMS) has  
17 enjoyed growing popularity in biomedical research. Most CXMS experiments utilize  
18 cross-linkers based on N-hydroxysuccinimide (NHS) ester, which react selectively with  
19 the amine groups found on the free N-termini of proteins and on the side chain of lysine  
20 (K) residues. It is also reported that under certain conditions they can react with the  
21 hydroxyl groups of serine (S), threonine (T), and tyrosine (Y). Some of the popular  
22 cross-link search engines including MeroX and xiSearch set STY, in addition to K, as  
23 cross-linkable sites by default. However, to what extent NHS ester cross-linkers react  
24 with STY under the typical CXMS experimental conditions remains unclear, nor has  
25 the reliability of STY-cross-link identifications. Here, by setting amino acids with  
26 chemically inert side chains such as glycine (G), valine (V), and leucine (L) as cross-  
27 linkable sites, which serves as a negative control, we show that software-identified  
28 STY-cross-links are only as reliable as GVL-cross-links. This is true across different  
29 NHS ester cross-linkers including DSS, DSSO, and DSBU, and across different search  
30 engines including MeroX, xiSearch, and pLink. Using a published dataset originated  
31 from synthetic peptides, we demonstrate that STY-cross-links indeed have a high false  
32 discovery rate. Further analysis revealed that depending on the data and the CXMS  
33 search engine used to analyze the data, up to 65% of the STY-cross-links identified are  
34 actually K-K cross-links of the same peptide pairs, up to 61% are actually K-mono-  
35 links, and the rest tend to contain short peptides at high risk of false identification.

## 37 Introduction

38 Chemical cross-linking of proteins coupled with mass spectrometry analysis  
39 (abbreviated as CXMS, XL-MS or CLMS) is a convenient and effective tool to obtain  
40 three-dimensional structural information of proteins and protein complexes. In CXMS  
41 a small chemical cross-linker, which typically contains two amine-reactive groups, is  
42 used to form a covalent linkage between a pair of closely spaced amino acid residues,  
43 usually lysine residues. After trypsin digestion and liquid chromatography-tandem  
44 mass spectrometry (LC-MS/MS) analysis, cross-linked peptide pairs are identified from  
45 the CXMS data using a software tool such as pLink<sup>1-2</sup>, XlinkX<sup>3-4</sup>, MeroX<sup>5</sup>, or xiSearch<sup>6-  
46 7</sup>. A pair of cross-linked peptides, or a cross-link hereinafter, can be mapped to their  
47 parent protein(s) to locate the residue pair, that is, the two residues that are covalently  
48 linked by the cross-linker. By applying a distance restraint to all the residue pairs  
49 identified, one can use CXMS data to help build or improve atomic models of proteins  
50 or protein complexes<sup>8-10</sup>. More recently, CXMS applications have been expanded to  
51 detecting protein dynamics<sup>11-12</sup>, visualizing the process of protein unfolding<sup>13</sup>, and  
52 mapping protein-protein interactomes<sup>14-16</sup>.

53  
54 A multitude of cross-linkers have been developed for CXMS to target different amino  
55 acids residues such as lysine<sup>17-22</sup>, arginine<sup>23</sup>, glutamic/aspartic acid<sup>24-26</sup>, tyrosine<sup>27</sup>, or  
56 cysteine<sup>28</sup>. The most commonly used ones are homo-bifunctional cross-linkers based  
57 on N-hydroxysuccinimide (NHS) esters, including BS<sup>3</sup>, DSS, DSSO, and DSBU<sup>29</sup>.  
58 NHS esters react with primary amines, which include the  $\epsilon$ -NH<sub>2</sub> of lysine and the  $\alpha$ -  
59 NH<sub>2</sub> of a protein N-terminus. It is demonstrated that at near physiological pH of 6.7 and  
60 7.8, an NHS ester cross-linker is highly specific towards the amine groups of peptides;  
61 even after 24 hours, there is no detectable reaction products with the peptide hydroxyl  
62 group on serine (S), threonine (T), or tyrosine (Y) unless there is a histidine residue in  
63 the same peptide<sup>30</sup>.

64  
65 With respect to which amino acids are considered cross-linkable by NHS ester cross-  
66 linkers, the current cross-link search engines have opted differently<sup>1-7, 31-38</sup>. pLink and  
67 XlinkX, for example, have only lysine (K) and protein N-termini in the default setting.  
68 These two search engines thus output typically only K-K cross-links. Here, for  
69 simplicity of expression, a K- or K-K cross-link refers to a cross-link of which either  
70 or both link sites are K or a protein N-terminus. Other search engines like MeroX and

71 xiSearch set KSTY and protein N-termini as cross-linkable sites by default. Adding  
72 STY as cross-linkable sites increases the number of identified residue pairs, with STY-  
73 cross-links making up as much as 30% of the total<sup>6,39</sup>. It is recognized that adding STY  
74 as cross-linkable sites increases the search space, which could increase false positive  
75 matches. To counter this negative effect, xiSearch gives K-STY and STY-STY cross-  
76 links less weight than K-K cross-links, and MeroX prohibits STY-STY cross-link  
77 identifications.

78

79 Although setting STY as cross-linkable sites is a somewhat common practice, the  
80 reliability of identified STY-cross-links has not been established firmly. We thus  
81 investigated this issue by comparing the STY-cross-links with the chemically  
82 impossible GVL-cross-links identified by the same software from the same CXMS data.  
83 The GVL-cross-links identified served as a negative control to estimate the extent of  
84 false identifications. We found that regardless of the search engine used, the number  
85 and the quality score distribution of STY- and GVL-cross-links were all comparable,  
86 this was true for different datasets generated by different laboratories using different  
87 NHS ester cross-linkers. This strongly suggests that STY-cross-link identifications are  
88 unreliable. We further verified that for STY- and GVL-cross-links the actual false  
89 discovery rate (FDR) far exceeded the intended FDR threshold, and uncovered two  
90 major sources of misidentification. Reviewing the evidence from this and other studies,  
91 we conclude that NHS ester cross-linkers generate few, if any, STY-cross-links under  
92 typical CXMS conditions. Adding STY as cross-linkable sites is not beneficial and  
93 cross-link search engines need to improve link-site localization function before they  
94 can be used to analyze CXMS data of cross-linkers that lack amino acid specificity such  
95 as photoactivated cross-linkers.

96

## 97 **Materials and Methods**

### 98 **2.1 software**

99 pLink 2.3.9, MeroX 2.0.1.4, xiSearch 1.7.6.3 conjugated with xiFDR 2.1.5.2 were used  
100 to identify cross-linked peptides.

101 The open search of pFind 3 (3.1.6) was used to identify mono-link peptides of DSS and  
102 Leiker.

103 PTMiner (1.2.6) was used to re-localize DSS and Leiker modification sites.

### 104 **2.2 datasets used in this study**

105 The experimental conditions and access IDs of the nine datasets used in this study are  
106 summarized in following table.

107

Table 1. datasets used in this study

| NO. | Dataset Name         | Description                                                                                                                                                                                                                                                 | Source                  |
|-----|----------------------|-------------------------------------------------------------------------------------------------------------------------------------------------------------------------------------------------------------------------------------------------------------|-------------------------|
| 1   | BS <sup>3</sup> -BSA | 12 µg of the bovine serum albumin was crosslinked with 1 mM BS <sup>3</sup> in 20 ul pH 7.4 HEPES buffer at 25 °C for 1 h. Digestion with trypsin, analysed by LC-MS/MS on Q-Exactive HF. HCD ms2 acquired using NCE 27 at Res=15K.                         | PXD039103               |
| 2   | DSSO-BSA             | 12 µg of the bovine serum albumin was crosslinked with 1 mM DSSO in 20 ul pH 7.4 HEPES buffer at 25 °C for 1 h. Digestion with trypsin, analysed by LC-MS/MS on Fusion Lumos. Stepped HCD ms2 acquired using NCE 21-27-33 at Res=15K.                       | PXD039103               |
| 3   | DSBU-SurA/OmpA       | 50 µg of the SurA/OmpA complex was crosslinked with DSBU (an unspecified concentration) in 20 mM Tris pH 8.0, 1 M urea for 30 min. Digestion with trypsin, analysed by LC-MS/MS on Q-Exactive HF-X. Stepped HCD ms2 acquired using NCE 22-25-28 at Res=15K. | PXD021872 <sup>40</sup> |
| 4   | DSSO-Ribo            | 1 µg/µL of the <i>E. coli</i> ribosome was crosslinked with 0.5 mM DSSO in pH 7.5 HEPES buffer at 25 °C for 1 h. Digestion with trypsin, analysed by LC-MS/MS on Fusion Lumos. Stepped HCD ms2 acquired using NCE 21-27-33 at Res=30K.                      | PXD011861 <sup>41</sup> |
| 5   | DSS-Mpneu            | 1 mg/mL of the Mpneu [ <i>Mycoplasma pneumoniae</i> ] cells was crosslinked with 2 mM DSS in pH 7.4 PBS buffer at 25 °C for 30 min. Digestion with trypsin, analysed by LC-MS/MS on Fusion Lumos. Stepped HCD ms2 acquired using NCE 21-26-31 at Res=50K.   | PXD017695 <sup>15</sup> |

|   |              |                                                                                                                                                                                                                                           |                                    |
|---|--------------|-------------------------------------------------------------------------------------------------------------------------------------------------------------------------------------------------------------------------------------------|------------------------------------|
| 6 | Leiker-Ecoli | 1 mg of the <i>E. coli</i> lysate protein was crosslinked with 250 µg Leiker in 300 µL pH 8.3 HEPES buffer at 25 °C for 30 min. Digestion with trypsin, analysed by LC-MS/MS on Q-Exactive. HCD ms2 acquired using NCE27 at Res=17.5K.    | (Tan D, eLife, 2016) <sup>21</sup> |
| 7 | DSS-hMito    | 1 mg/mL of the isolated mitochondria proteins were crosslinked with 0.225 mM DSS in 500 µL pH 7.4 PBS buffer at 25 °C for 40 min. Digestion with trypsin, analysed by LC-MS/MS on Fusion Lumos. HCD ms2 acquired using NCE 30 at Res=30K. | PXD014675 <sup>39</sup>            |
| 8 | DSS-SynPep   | 5 mM of the synthetic peptides was crosslinked with 2 mM DSS in 5 µL pH 8.0 HEPES buffer at 25 °C for 2.5 h. Analysed by LC-MS/MS on Q-Exactive HF-X. HCD ms2 acquired using NCE 28 at Res=30K.                                           | PXD014337 <sup>42</sup>            |
| 9 | DSBU-SynPep  | 5 mM of the synthetic peptides was crosslinked with 2 mM DSBU in 5 µL pH 8.0 HEPES buffer at 25 °C for 2.5 h. Analysed by LC-MS/MS on Q-Exactive HF-X. Stepped HCD ms2 acquired using NCE 27-30-33 at Res=15K.                            | PXD014337 <sup>42</sup>            |

108

### 109 2.3 Search parameters

110 For cross-linked peptides identification: Precursor mass tolerance 5 ppm, fragment ion  
111 mass tolerance 20 ppm, fixed modification C+57.021 Da, variable modification  
112 M+15.995 Da, peptide length minimum 5 amino acids and maximum 60 amino acids  
113 per chain, peptide mass minimum 500 and maximum 6,000 Da per chain, enzyme  
114 trypsin, three missed cleavage sites were allowed.

115

116 FDR cutoff: For xiSearch, the results were filtered by applying a 5% FDR cutoff at the  
117 residue pair level, and “boost” was checked. For pLink and MeroX, the results were  
118 filtered using a 5% FDR cutoff at the peptide pair level.

119

120 For mono-link peptides identification: Precursor mass tolerance 20 ppm, fragment ion

121 mass tolerance 20 ppm, peptide length minimum 6 amino acids and maximum 100  
122 amino acids per chain. The mono-link of DSS or Leiker on protein N-terminal, K, S, T,  
123 Y, G, V, and L was selected for the variable box. The results were filtered by applying  
124 a 1% FDR cutoff at both the peptide and protein group levels.

125

126 For mono-link sites localization: the pFind search parameter file “pFind.cfg” and  
127 identification file “pFind.spectra” were imported to PTMiner. transfer FDR (threshold  
128 1%) was used for the localization of modification sites, and sites with probability less  
129 than 0.5 were filtered out.

#### 130 **2.4 link site setting**

|                 |             | <b>KSTY group</b>                           | <b>KGVL group</b>                           |
|-----------------|-------------|---------------------------------------------|---------------------------------------------|
| <b>MeroX</b>    | Alpha sites | K{                                          | K{                                          |
|                 | Beta sites  | KSTY{                                       | KGVL{                                       |
| <b>xiSearch</b> | Alpha sites | K(0) N-terminal (0)<br>S(0.2) T(0.2) Y(0.2) | K(0) N-terminal (0)<br>G(0.2) V(0.2) L(0.2) |
|                 | Beta sites  | K(0) N-terminal (0)<br>S(0.2) T(0.2) Y(0.2) | K(0) N-terminal (0)<br>G(0.2) V(0.2) L(0.2) |
| <b>pLink 2</b>  | Alpha sites | KSTY[                                       | KGVL[                                       |
|                 | Beta sites  | KSTY[                                       | KGVL[                                       |

131 \* [ {stand for the N terminal of protein.

## 132 **Results**

133 **STY-cross-links identified from CXMS data appear as reliable as chemically**  
134 **impossible GVL-cross-links across different NHS ester cross-linkers.**

135 To assess the reliability of STY-cross-links in CXMS identification results, we adopted  
136 a strategy that has been used in phosphoproteomics to estimate the false localization  
137 rate of phosphosites by treating alanine, which cannot be phosphorylated, as if it  
138 could.<sup>43</sup> Likewise, we treated glycine (G), valine (V), and leucine (L), which cannot be  
139 cross-linked as if they could, to estimate the fraction of falsely identified STY-cross-  
140 links. To start with, we selected three datasets, each representing a different group of  
141 NHS ester cross-linkers. The BS<sup>3</sup>-BSA dataset was generated using a non-cleavable  
142 cross-linker BS<sup>3</sup>; the DSSO-BSA dataset was generated using a gas-phase cleavable  
143 cross-linker DSSO; and the DSBU-SurA/OmpA dataset was generated using DSBU,  
144 whose spacer arm can be cleaved to some extent in the gas phase. All three cross-likers  
145 are used frequently, and all three datasets originated from low-complexity samples

146 containing only one (BSA) or two (SurA/OmpA) proteins.

147

148 xiSearch and MeroX, which routinely set K, S, T and Y as cross-linkable sites, were  
 149 used to search for cross-links. As a negative control, we set K, G, V and L as cross-  
 150 linkable sites and repeated the search. At 5% FDR cutoff, we obtained in most cases  
 151 similar numbers of STY-cross-links and GVL-cross-links (Figure 1, compare STY and  
 152 GVL within each panel). On the BS<sup>3</sup>-BSA dataset, xiSearch identified even more GVL-  
 153 GVL cross-links than STY-STY cross-links (Figure 1A, 23 vs. 7), and MeroX identified  
 154 more K-GVL cross-links than K-STY cross-links (Figure 1D, 102 vs. 64). Since the  
 155 number of STY-cross-links did not surpass that by random match as estimated by GVL-  
 156 cross-links for BS3, DSSO and DSBU, the reliability of the identified STY-cross-links  
 157 becomes doubtful.

158

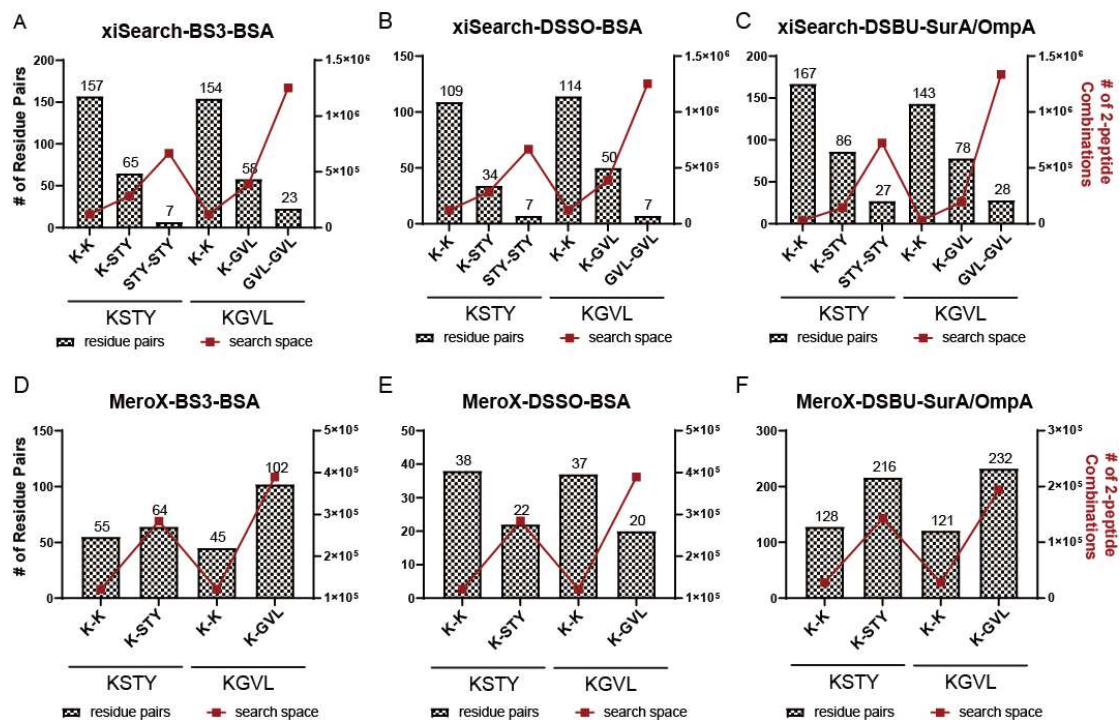

159

160 **Figure 1.** Similar numbers of STY-cross-links and GVL-cross-links were identified for  
 161 different NHS ester cross-linker. (A-C) xiSearch identification. (D-F) MeroX  
 162 identification. KSTY or KGV L were set as cross-linkable sites. The number of  
 163 identified residue pair are indicated by bars (left y-axis) and the size of the search space  
 164 as measured by the numbers of possible, link-site-sensitive peptide pair combinations  
 165 is indicated by line-connected red squares (right y-axis).

166

167 **STY-cross-links identified using different cross-link search engines are similarly**  
 168 **questionable.**

169 Wondering whether misidentification of STY-cross-links is a general problem in CXMS  
170 data analysis, we included another cross-link search engine pLink 2<sup>2</sup> in further  
171 investigations. Two test datasets were used at this stage: the DSSO-Ribo dataset  
172 represents a median-complexity sample of purified *E. coli* ribosomes cross-linked with  
173 DSSO, and the DSS-Mpneu dataset from *Mycoplasma pneumoniae* cells cross-linked  
174 in-situ using DSS. On the DSSO-Ribo dataset, xiSearch, MeroX and pLink all produced  
175 more GVL-cross-links than STY-cross-links (Figure 2A-C). Take the xiSearch results  
176 as an example, setting KSTY or KGVL as cross-linkable sites yielded, respectively, 829  
177 or 771 K-K cross-links, 95 or 151 K-nonK cross-links, and 7 or 30 nonK-nonK cross-  
178 links (Figure 2A). Similar observations were made on the DSS-Mpneu dataset using  
179 xiSearch and pLink 2 (Supplementary Figure 1A-B). We were not able to complete a  
180 MeroX search on large datasets like this one, so only xiSearch and pLink 2 search  
181 results were available for the high-complexity samples. In sum, regardless of sample  
182 complexity, cross-linker, and data analysis software, the number of STY-cross-links  
183 identified from any of the datasets were not above the number of GVL-cross-links  
184 identified from the same data. Therefore, judged by the number of identifications, STY-  
185 cross-links are as reliable as the chemically impossible GVL-cross-links.

186

187 Next, we asked whether the identified STY-cross-links scored better than the GVL-  
188 cross-links in cross-link-spectrum match (CSM). As shown in Figure 2D-F (DSSO-  
189 Ribo) and Supplementary Figure 1C-D (DSS-Mpneu), for all three search engines  
190 tested, the median CSM scores of the identified STY-cross-links are similar to, or lower  
191 than, those of the GVL-cross-links, the median CSM score of the K-K cross-links, as a  
192 reference, are always higher than those of the K-nonK and nonK-nonK cross-links  
193 identified from the same data; and there is no difference in the CSM score distribution  
194 of the K-K cross-links identified between the KSTY search and KGVL search (Figure  
195 2D-F and Supplementary Figure 1C-D).

196

197 Additionally, we noticed that some of the MS2 spectra received dual identities, that is,  
198 they were identified as STY-cross-links in the KSTY search, and as GVL-cross-links in  
199 the KGVL search. One such example is shown in Figure 2G. As can be seen, a strong  
200  $y_6^{++}$  fragment ion and a weak  $b_7^{++}$  fragment ion of the  $\alpha$ -peptide GALDCSGVKDR  
201 (labeled as  $\alpha y_6^{++}$  745.42 and  $\alpha b_7^{++}$  716.65 on the spectrum) are able to position the  
202 DSS link site to -SG- in the middle of the  $\alpha$ -peptide, but since there is no detected



203 cleavage between S and G to pinpoint the link site, this spectrum is matched either as a  
 204 S-cross-link in KSTY search or a G-cross-link in KGVL search. Intrigued by this, we  
 205 collected all the dual-identity spectra found in this study and analyzed their CSM scores.  
 206 As shown in Figure 2H-I, their CSM score distributions seem identical either as STY-  
 207 cross-links or as GVL-cross-links, regardless of the search engine used. Therefore,  
 208 judged by the number of identified cross-links as well as the quality of the CSMs, the  
 209 STY-cross-links are not better than the GVL-cross-links, and all the search engines  
 210 seem to share this problem.  
 211

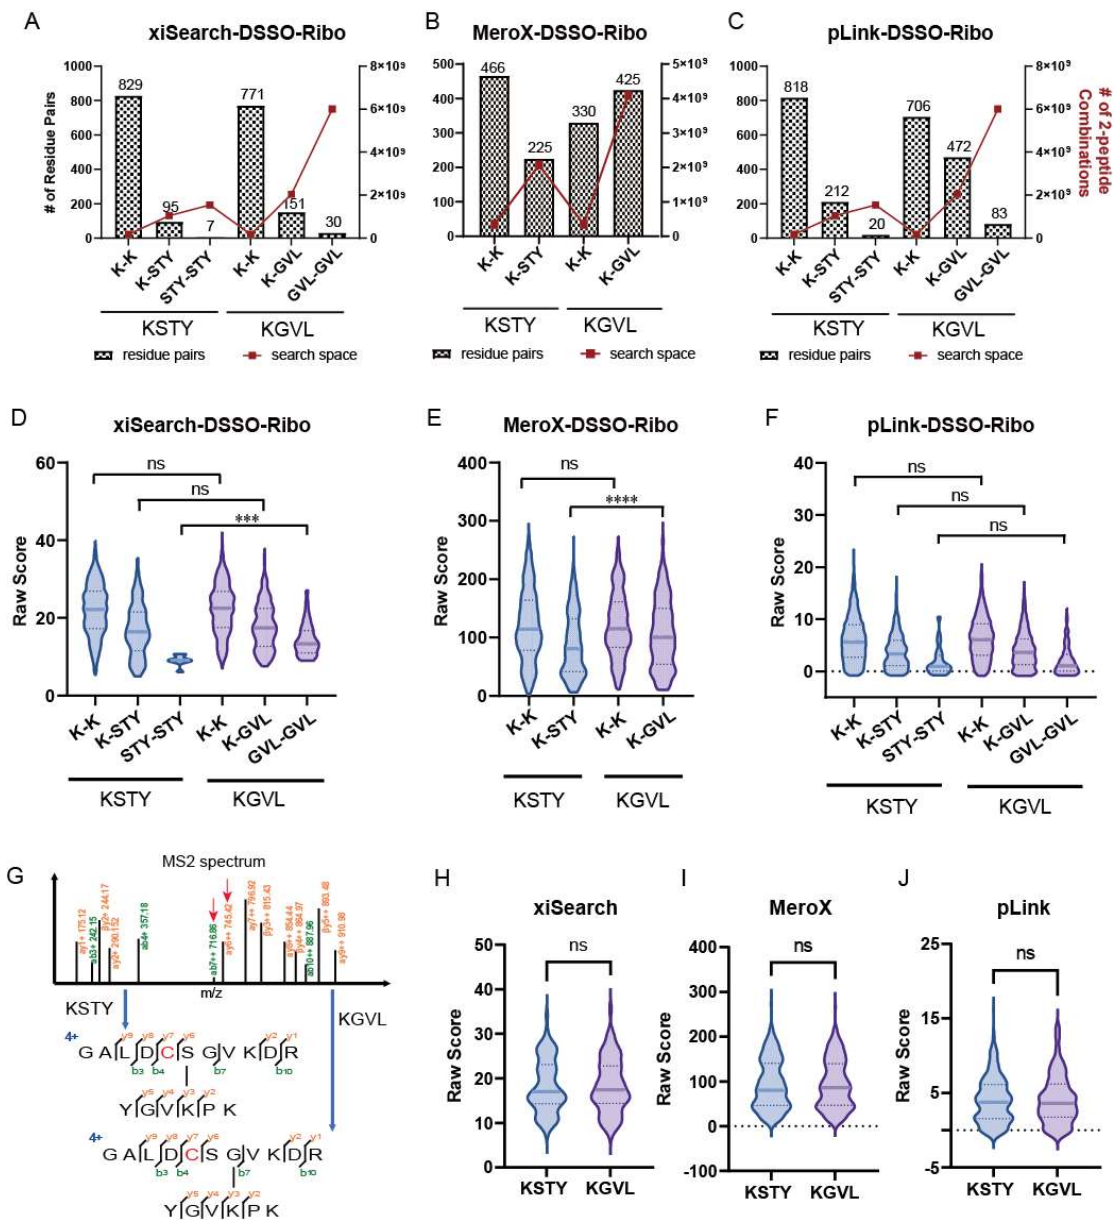

212  
 213 **Figure 2.** STY-cross-links are only as reliable as GVL-cross-links regardless of the  
 214 search engines used to identify them. The numbers (A-C) and the CSM score  
 215 distributions (D-F) of the STY- and GVL-cross-link identifications by xiSearch, MeroX,

216 or pLink on the medium-complexity DSSO-Ribo dataset. In (A-C) the number of  
217 identified residue pair are indicated by bars (left y-axis) and the size of the search space  
218 as measured by the numbers of possible, link-site-sensitive peptide pair combinations  
219 is indicated by line-connected red squares (right y-axis). (G) Example of a dual-identify  
220 MS2 spectrum. (H-J) CSM score distribution of the dual-identity MS2 spectra found  
221 from the xiSearch (n=78,  $p=0.783$ ), MeroX (n=252,  $p=0.258$ ), and pLink (n=426,  
222  $p=0.051$ ).

223

224 **STY-mono-links identified using a PTM analysis workflow are also questionable.**

225 The formation of a cross-link involves two ligation reactions, one on each end of a  
226 cross-linker. More likely than not, the two ligation reactions occur one after another.  
227 The intermediate product—a mono-link—can go on to form a cross-link, or not if the  
228 remaining NHS ester is hydrolyzed. In the latter case, a mono-link becomes an end  
229 product. In our experience, there are more mono-links than cross-links<sup>21</sup>. We reasoned  
230 that if there are truly STY-cross-links, there should be STY-mono-links and they are  
231 likely more abundant.

232

233 Although many cross-link search engines output mono-link identifications, some such  
234 as MeroX do not. For this reason and that a mono-link is a linear peptide with a small  
235 chemical modification, we used Open-pFind<sup>44</sup> to identify mono-links. Of the three  
236 datasets used, two originated from DSS-linked samples and one from a Leiker-linked  
237 sample. Leiker is a NHS ester cross-linker with a biotin tag<sup>21</sup>. In Open-pFind search, K,  
238 S, T, Y, G, V, and L were set as variable modification sites for DSS and Leiker, with 1%  
239 FDR cutoff at both the peptide level and the protein group level. Following re-  
240 evaluation and correction of the modification sites by PTMiner<sup>45</sup>. We obtained >7,000  
241 DSS mono-links on K, and 4-17 times less DSS mono-links on STY or GVL (Figure  
242 3). More importantly, the number of identified mono-links on STY were less than those  
243 on GVL, which cannot be modified. These results suggest that more likely than not, the  
244 STY-mono-links identified from samples treated with NHS ester cross-linker are  
245 spurious matches.

246

247 In agreement with the above conclusion, a recent proteome-scale study has found no  
248 evidence of a NHS ester probe targeting S, T, or Y<sup>46</sup>. In this study, a HeLa cell lysate  
249 was incubated with a pair of light and heavy isotope encoded NHS ester probe, and  
250 pChem—a software tool developed specifically to assign modification sites of chemical  
251 probes—was employed to analyze the data. The authors found that the NHS ester probe

252 modified only lysine residues and protein N-termini.

253

254 Taken together, we conclude that under the conditions typically used in CXMS  
255 experiments, it should be rare for an NHS ester cross-link to react with S, T, or Y, if  
256 ever it does. The STY-cross-links identified by the current versions of cross-link search  
257 engines are mostly unreliable.

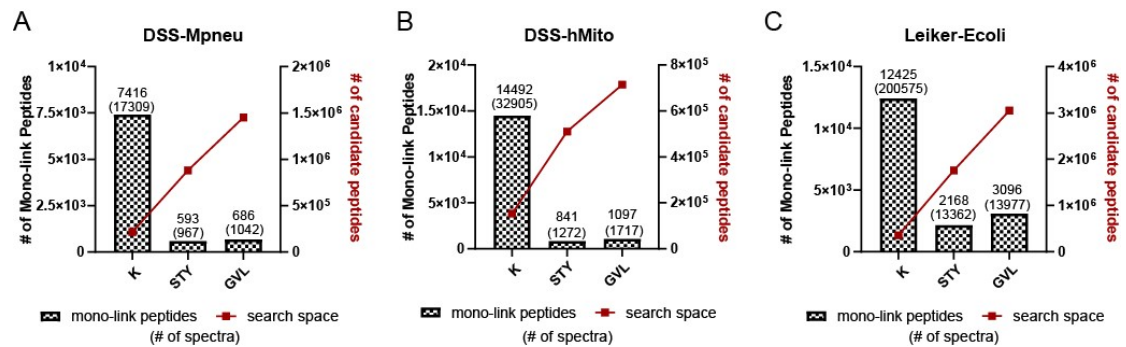

258

259 **Figure 3.** Mono-links of NHS ester cross-linkers identified by Open-pFind. The bars  
260 indicate the numbers of mono-link peptides for DSS (A-B) or Leiker (C) from the  
261 indicated datasets (left y-axis), with the number of corresponding MS2 spectra shown  
262 in parentheses, and the number of candidate peptides indicated by line-connected red  
263 squares (right y-axis).

264

### 265 **Setting STY as additional cross-linkable sites greatly increases FDR.**

266 To quantify the effect of setting STY as additional cross-linkable sites on cross-link  
267 identifications, we turned to the benchmark datasets of synthetic peptides<sup>42</sup>. To generate  
268 these datasets, 95 chemically synthesized peptides of a Cas9 protein were divided into  
269 12 group, cross-linked within-group and pooled together for LC-MS/MS after the cross-  
270 linking reactions were stopped. Thus, between-group cross-links, if identified, must be  
271 false; whereas within-group cross-links may be true. This provides a means to estimate  
272 FDR experimentally, independent of the software estimated FDR. because some of the  
273 within-group cross-link identifications may be false, this experimental FDR, calculated  
274 by dividing the number of between-group cross-links with the sum of between- and  
275 within-group cross-links, estimates the lower boundary of the actual FDR, We used two  
276 benchmark dataset, generated with DSS and another with DSBU. The MS data were  
277 searched with or without setting STY as cross-linkable sites in addition to K and protein  
278 N-termini. A cutoff of 5% software estimated FDR was applied at the peptide pair level.  
279 The K-K, K-STY, and STY-STY cross-link identifications from the KSTY search were  
280 examined separately. As shown in Figure 4, for all three search engines tested and

281 xiSearch in particular, the STY-cross-links identified had much higher experimental  
282 FDR than the K-K cross-links identified either from a KSTY search or a K only search.  
283 The experimental FDR of the STY-STY-cross-links identified by xiSearch reached up  
284 to 100% (Figure 4A and 4D). Invariably, KSTY search increased experimental FDR  
285 and slightly decreased the number of legitimate K-K cross-link identifications. This  
286 result shows that setting STY as additional cross-linkable sites brings more harm than  
287 benefit.

288

289 We also analyzed the distribution of the length of the peptides constituting the false,  
290 between-group cross-links. Compared with the legitimate cross-links, the false ones  
291 tend to have short peptides of 5-7 aa (Figure 4 G-H). The implication of this result will  
292 be discussed later.

293

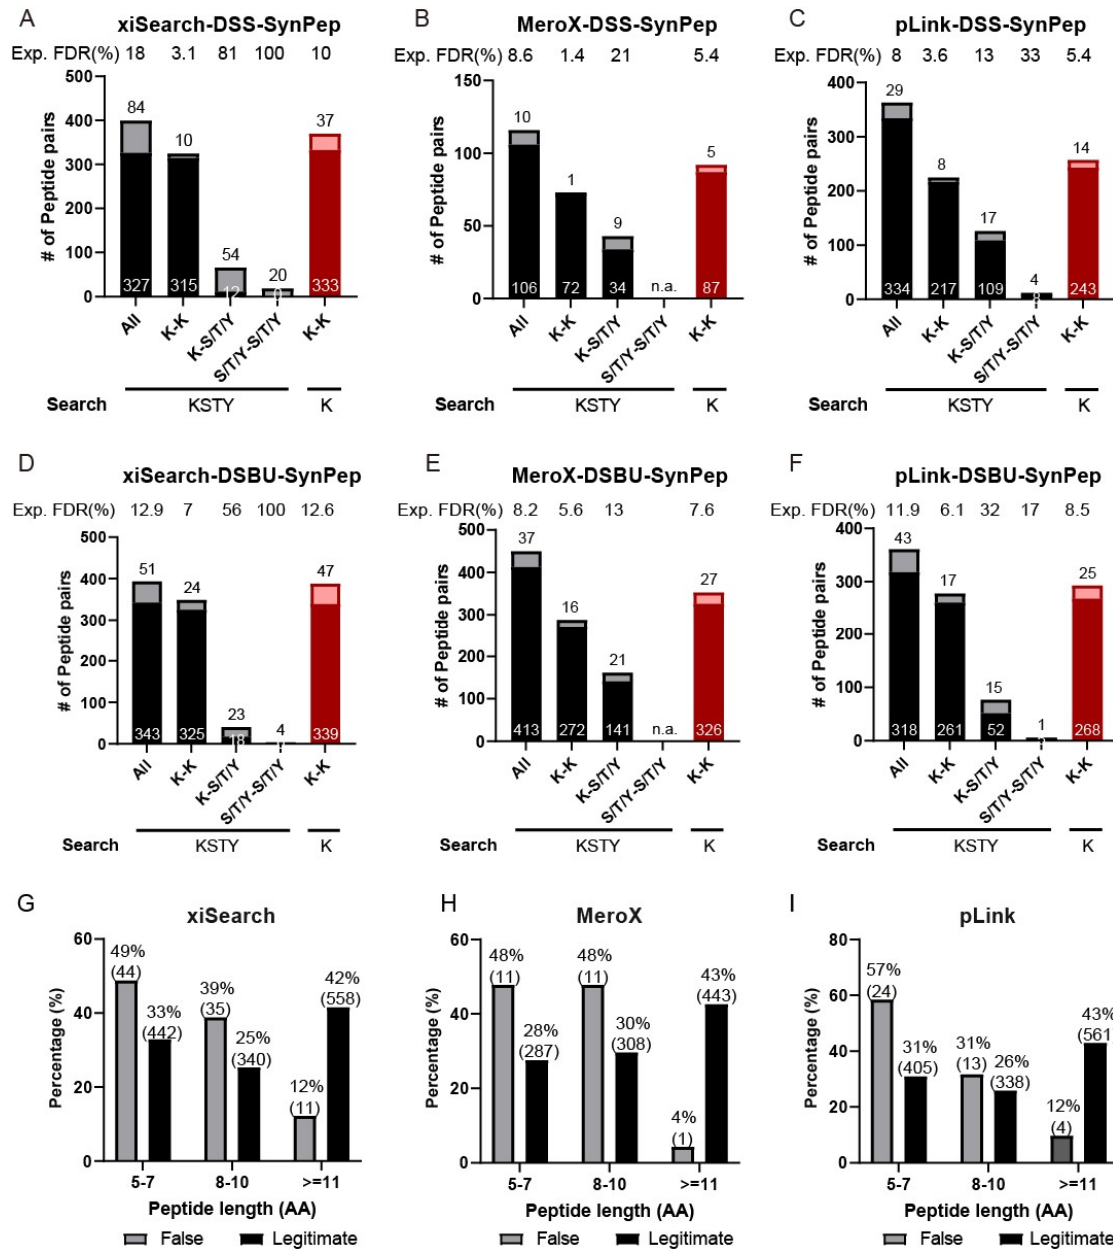

294

295 **Figure 4.** Experimental FDR of STY-cross-links estimated using two benchmark  
 296 datasets of synthetic peptides. (A-C) Search results of the DSS-SynPep dataset by  
 297 xiSearch, MeroX, and pLink. (D-F) Search results of the DSBU-SynPep dataset by  
 298 xiSearch, MeroX, and pLink. (G-I) Distribution of the length of the peptides  
 299 constituting false cross-links versus those of the legitimate cross-links identified by the  
 300 indicated search engine. Note: these two datasets were searched against cas9 and 293  
 301 common contaminant protein sequences. The identification results were filtered using  
 302 a 5% software estimated FDR at the peptide pair level. Light shade denotes the false  
 303 between-group cross-links and dark shade denotes the legitimate, within-group  
 304 cross-links. In (G-I), the number of peptides in each bin is shown in parentheses.

305

306 **A subset of STY- or GVL-cross-links are misidentified K-K cross-links.**

307 Having found that most if not all STY-cross-link identifications are probably false, we  
308 asked what might have led to the erroneous identifications. A close examination of the  
309 problematic MS2 spectra revealed that a subset of them are actually K-K cross-links  
310 misidentified as STY- or GVL-cross-links.

311

312 One example is shown in Figure 5A-E. A 5<sup>+</sup> precursor ion whose monoisotopic peak is  
313 *m/z* 576.596 is a cross-link between DRVEDATLVLSVGDEVEAKFTGVDRK ( $\alpha$   
314 peptide) and KGALVTGK ( $\beta$  peptide). Across the chromatogram peak, which apexed  
315 at 74.2 min and trailed to 76 min, four MS2 spectra were acquired and identified  
316 respectively as K <sup>$\alpha$ 19</sup>-K <sup>$\beta$ 1</sup>, V <sup>$\alpha$ 23</sup>-K <sup>$\beta$ 1</sup>, K <sup>$\alpha$ 19</sup>-G <sup>$\beta$ 2</sup>, and K <sup>$\alpha$ 19</sup>-K <sup>$\beta$ 1</sup> cross-links. The first (Figure  
317 5B) and the fourth (Figure 5E) MS2 spectra both have contiguous b- and y-series to  
318 pinpoint the link sites to K <sup>$\alpha$ 19</sup> and K <sup>$\beta$ 1</sup>. The second MS2 has two tiny peaks at *m/z* 628.35  
319 and *m/z* 908.43 that happen to match the theoretical *m/z* of  $\alpha$ Sy<sub>5</sub><sup>+</sup> and  $\alpha$ Ly<sub>7</sub><sup>+</sup>, respectively  
320 (Figure 5C). As a result, the link site on the  $\alpha$  peptide is assigned to V <sup>$\alpha$ 23</sup>, instead of  
321 K <sup>$\alpha$ 19</sup>. The third MS2 (Figure 5D) is of the lowest base peak intensity (2.4e+04),  
322 compared to the other three (2.7e+04 to 5.2e+05). The *m/z* 129.10 ion, interpreted as  
323  $\beta$ b<sub>1</sub><sup>+</sup>, is the reason to localize the link site on the  $\beta$ -peptide to G <sup>$\beta$ 2</sup> instead of K <sup>$\beta$ 1</sup>.  
324 However, according to the peptide fragmentation mechanism, which is deduced from  
325 numerous experimental observations and validated by theoretical calculations, there is  
326 no b<sub>1</sub> ion under normal circumstances. Another and better interpretation of *m/z* 129.10  
327 is [y<sub>1</sub>-H<sub>2</sub>O]<sup>+</sup> from either  $\alpha$ - or  $\beta$ -peptide, as both of them have a C-terminal lysine  
328 residue. When the same MS2 data were searched again by specifying K instead of  
329 KGVL as cross-link sites, all four of them were identified as K <sup>$\alpha$ 19</sup>-K <sup>$\beta$ 1</sup> cross-links of the  
330 same peptide pair.

331

332 In total, we found from the xiSearch, MeroX, and pLink search results 283, 218, 768  
333 pairs of apparent link site isoforms, respectively. In each pair are two cross-links of the  
334 same two peptides, identified from the same raw file, but one is a K-K cross-link and  
335 the other is a GVL-cross-link. Paired comparison of the best MS2 of the K-K cross-link  
336 and the best MS2 of the GVL-cross-link finds that the former has a higher CSM score  
337 than the latter in most cases ( $p < 0.0001$ ) (Figure 5F-H). Naturally, the MS2 spectra of  
338 such GVL-cross-links, if searched again with K instead of KGVL as the cross-linkable  
339 link site, are then identified as their cognate K-K cross-links. (Supplementary Table 5).



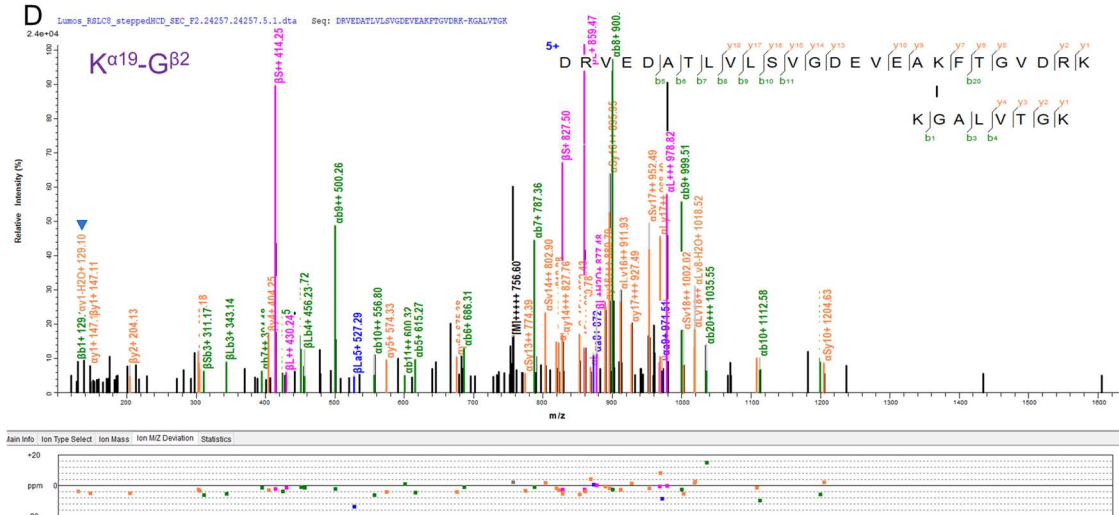

343

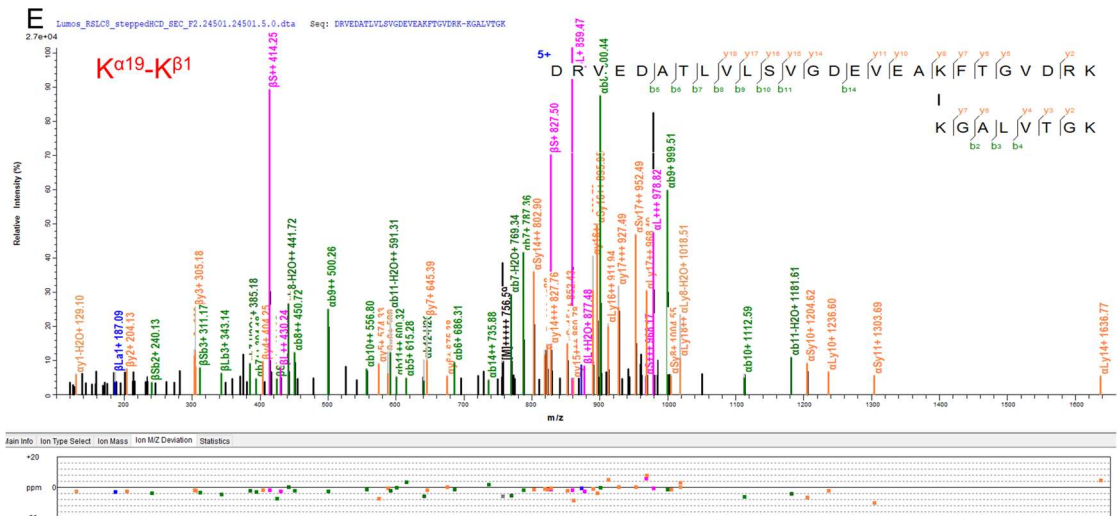

344

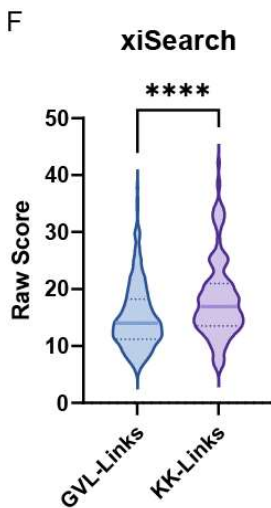

345

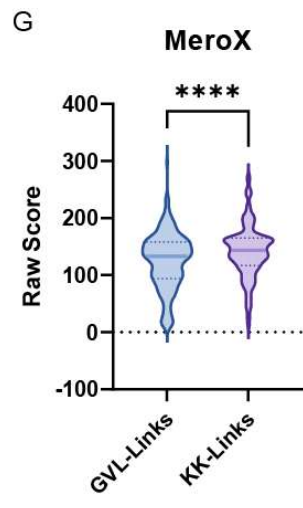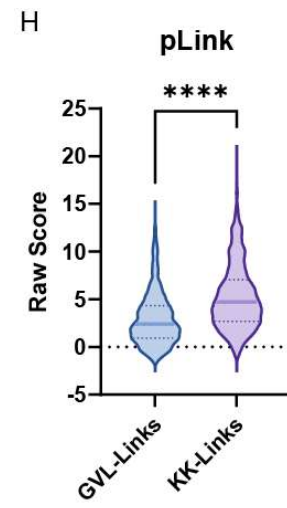

**Figure 5.** K-K cross-links misidentified as GVL-cross-links.  
 (A) The extracted ion chromatogram (XIC) of a pair of cross-linked peptides  
 DRVEDATLVLSVGDEVEAKFTGVD R K- K G A L V T G K ( $m/z=756.59$   $z=5$ ). Three  
 link-site isoforms were identified by four MS2 spectra across the chromatogram peak.  
 Shown on the left is the isotopic peak cluster of the precursor ion.



351 (B-E) The four MS2 spectra of the cross-linked peptide pair in (A), annotated according  
352 to their link-site identifications.

353 (F-H) Comparison of the scores between the GVL-cross-links and their cognate K-K  
354 cross-links identified from the same data by xiSearch ( $n = 283$ ,  $p < 0.0001$ ), MeroX ( $n$   
355  $= 218$ ,  $p < 0.0001$ ), and pLink ( $n = 768$ ,  $p < 0.0001$ ).

356

357 Similar observations were made on the STY-cross-links. In the example shown in  
358 Figure 6A-C, a cross-link between PWNSTWFANTKEFADNLDSEDFK ( $\alpha$ -peptide)  
359 and LVLERPAKSL ( $\beta$ -peptide) was identified twice across the chromatogram peak of  
360 the  $4^+$  precursor at monoisotopic  $m/z$  1018.752 (Figure 6A). However, the link sites  
361 were identified as  $K^{\alpha 11}$ - $K^{\beta 8}$  at the apex from a high signal intensity MS2 (base peak  
362 intensity  $1.3e+06$ , Figure 6C) and as  $T^{\alpha 10}$ - $S^{\beta 9}$  in the ascending phase of from a lower  
363 intensity MS2 ( $1.7e+05$ , Figure 6B). The higher- but not the lower-intensity MS2 has  
364 fragment ions to pinpoint the link site on the  $\alpha$ -peptide. On the  $\beta$ -peptide, assigning the  
365 link site to  $S^{\beta 9}$  instead of  $K^{\beta 8}$  relies entirely on a tiny peak of  $m/z$  429.24, which happens  
366 to match the theoretical  $m/z$  of  $\beta Sy_3^+$  (Figure 6B). When the cross-linkable site was set  
367 to K, this MS2 spectrum (Figure 6B) was identified as  $K^{\alpha 11}$ - $K^{\beta 8}$  cross-link, just like the  
368 other one (Figure 6C).

369

370 Supplementary Figure 3 shows another example. Cross-links between  
371 SGKSELEAFEVALENVRPTVEVK ( $\alpha$ -peptide) and VKHPSELVNVGDELTVK ( $\beta$ -  
372 peptide) were identified. MS2 from the  $4^+$  precursor was identified as a STY-cross-link  
373 ( $S^{\alpha 1}$ - $K^{\beta 2}$ ), while that from  $5^+$  precursor was identified as a K-K cross-link ( $K^{\alpha 3}$ - $K^{\beta 2}$ )  
374 (Supplementary Figure 3). The MS2 of the  $5^+$  precursor, in contrast, is a high-quality  
375 spectrum with contiguous fragment ion series to pinpoint the link site to  $K^{\alpha 3}$   
376 (Supplementary Figure 3B). In contrast, the MS2 of the  $4^+$  precursor is a poor-quality  
377 spectrum with many missing ions (Supplementary Figure 3C). No fragment ions are  
378 present to pinpoint the link site on the  $\alpha$ -peptide; it could be any one of the first nine  
379 residues if the NHS ester cross-linking chemistry is ignored. Therefore, we conclude  
380 that the  $S^{\alpha 1}$ - $K^{\beta 2}$  cross-link is identified incorrectly, it is actually a K-K cross-link.

381

382 In the xiSearch, MeroX, and pLink search results, we found a total of 175, 150, and 459  
383 MS2 spectra that behave like this, that is, when the cross-linkable sites are set  
384 differently, the peptide sequence identifications remain the same, but link site  
385 identifications do not. Paired comparison finds that the K-K cross-links have higher

386 CSM scores than the STY-cross-links in most cases ( $p < 0.0001$ , Figure 6D). This  
 387 indicates that some of the STY-cross-links are in fact K-K cross-links. Similar with the  
 388 GVL-cross-links, the MS2 spectra of such STY-cross-links, if searched again with K-,  
 389 not KSTY-, as cross-linkable sites, are identified as their cognate K-K cross-links.  
 390 (Supplementary Table 5).  
 391

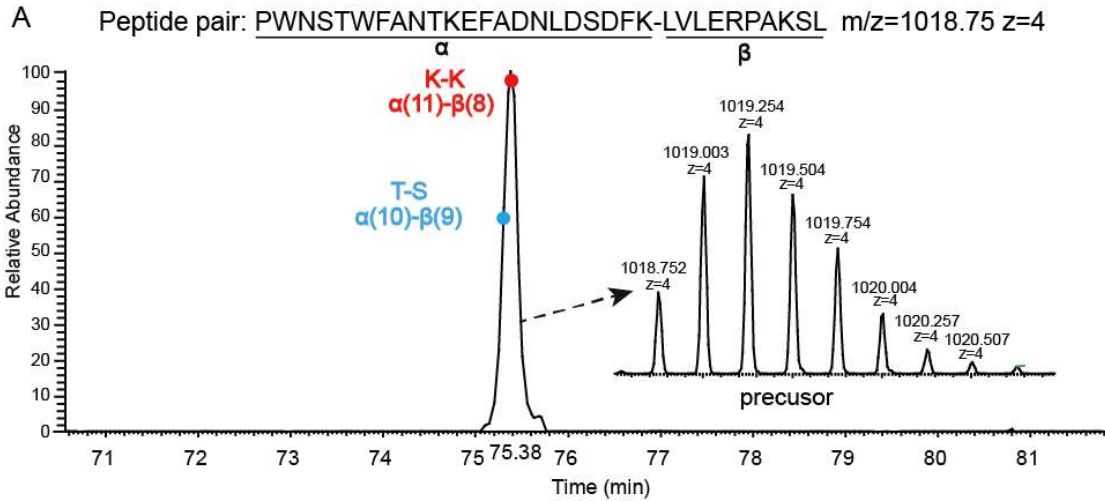

392

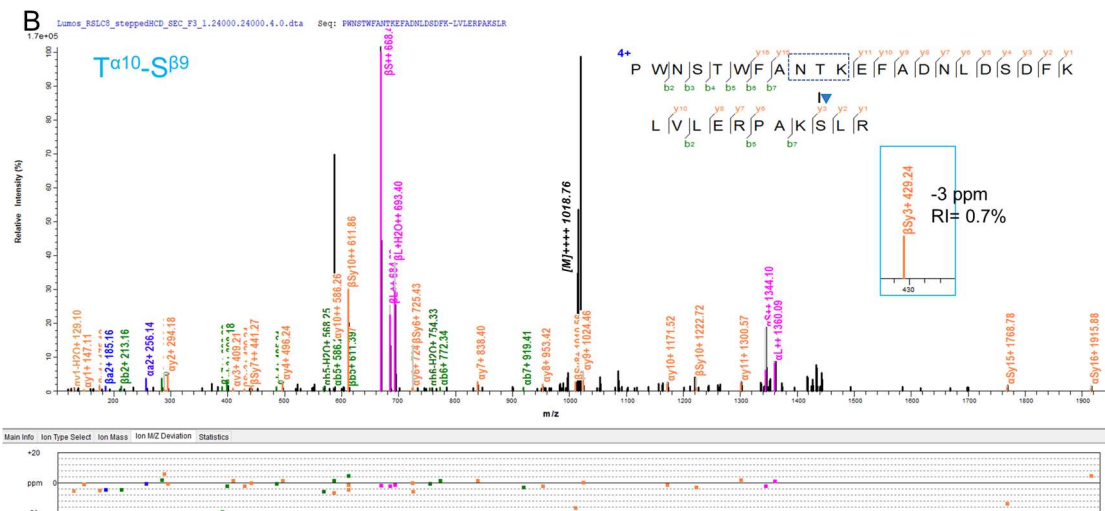

393

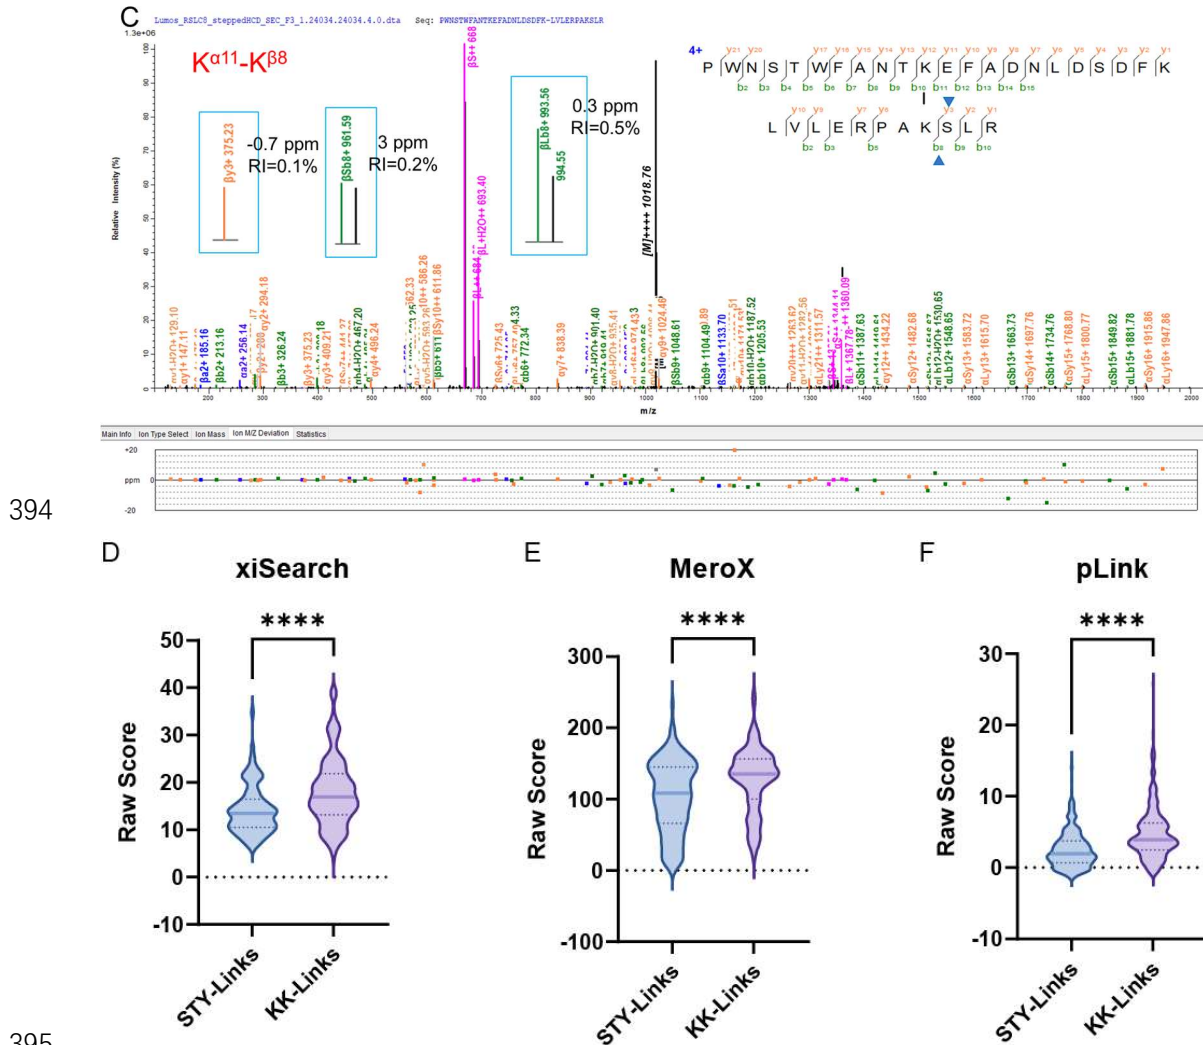

394

395

396 **Figure 6.** K-K cross-links misidentified as STY-cross-links.

397 (A) The XIC of a pair of cross-linked peptides SGKSELEAFEVALENVRPTVEVK-  
 398 VKHPSELVNVGDELTVK ( $m/z=1018.75$   $z=4$ ). Two link-site isoforms were identified  
 399 from the indicated positions in XIC (solid circles). The isotopic peak cluster of the  
 400 precursor was shown on the right.

401 (B-C) The MS2 spectra of two link-site isoform, T $\alpha$ <sup>10</sup>-S $\beta$ <sup>9</sup> and K $\alpha$ <sup>11</sup>-K $\beta$ <sup>8</sup>. (RI=relative  
 402 intensity)

403 (D-F) Comparison of the scores between the GVL-cross-links and their cognate K-K  
 404 cross-links identified from the same data by xiSearch ( $n=175$ ,  $p<0.0001$ ), MeroX ( $n$   
 405  $=150$ ,  $p<0.0001$ ), and pLink ( $n=459$ ,  $p<0.0001$ ).

406

407 Below is a brief account of our findings from inspecting the MS2 spectra of  
 408 questionable cross-link identifications. In some of the MS2 spectra we found no ions  
 409 supporting a STY/GVL link site due to the absence of certain cleavage products (Figure  
 410 6B). For others, it is often clear that their assumed identities are dubious as they have  
 411 the following characteristics.

- 412 (1) Unaccompanied by isotopic peaks to verify their assumed charge state  
413 (Supplementary Figure 4A-B).
- 414 (2) Low intensity—often not above the tiny peaks at the “grass” level (Supplementary  
415 Figure 4C).
- 416 (3) Large mass deviation—often an outlier relative to the mass deviations of other  
417 fragments ions (Supplementary Figure 4B S4D).
- 418 (4) Can be interpreted differently, e.g., as an isotopic peak of a different fragment ion  
419 (Supplementary Figure 4E).  $m/z$  129.10 is a frequent “offender” in this category. It  
420 is  $[y_1-H_2O]^+$  when a peptide has a K at the C-terminus, but when interpreted by the  
421 search engine as  $b_1^+$  for a peptide with K at the N-terminus, it becomes evidence  
422 against assigning the link site to the N-terminal K. However, the latter interpretation  
423 is incorrect because peptides normally do not produce  $b_1^+$  ions<sup>47</sup>. Examples are  
424 shown in Supplementary Figure 4E in addition to Figure 5, Figure 6, and  
425 Supplementary Figure 3.

426

427 **A subset of STY- or GVL-cross-links are misidentified mono-links.**

428 Among the intra-protein GVL-cross-links, we noticed that sometimes the two cross-  
429 linked peptides are adjacent to each other in the primary sequence. For example, the  
430 two peptides of the G-V cross-link in Figure 7A are aa265-aa274 ( $\beta$ -peptide) and aa275-  
431 aa293 ( $\alpha$ -peptide) of the BSA protein. We wondered whether this  $BS^3$  cross-link might  
432 be a  $BS^3$  mono-link of aa265-aa293, because theoretically they have the same precursor  
433 mass and some of their fragment ions are also the same (the ones not containing a linked  
434 residue). Indeed, the MS2 of this G-V cross-link is better explained as a mono-link of  
435 aa265-aa293 with  $BS^3$  attached to  $K^{274}$  (Figure 7B). Likewise, the MS2 spectra of a  
436 subset of STY-cross-links are better explained by mono-links of the related, adjoined  
437 peptides. One such example is shown in Figure 7C-D.

438

439 This type of false identification is not limited to  $BS^3$  or DSS, it is common to DSSO  
440 and DSBU as well (Figure 8). Although cross-linker independent, misidentification of  
441 mono-link as cross-link is search engine dependent; it occurs in xiSearch and pLink but  
442 not MeroX search results (Figure 8). The authors of MeroX have reported this type of  
443 misidentification<sup>48</sup>.

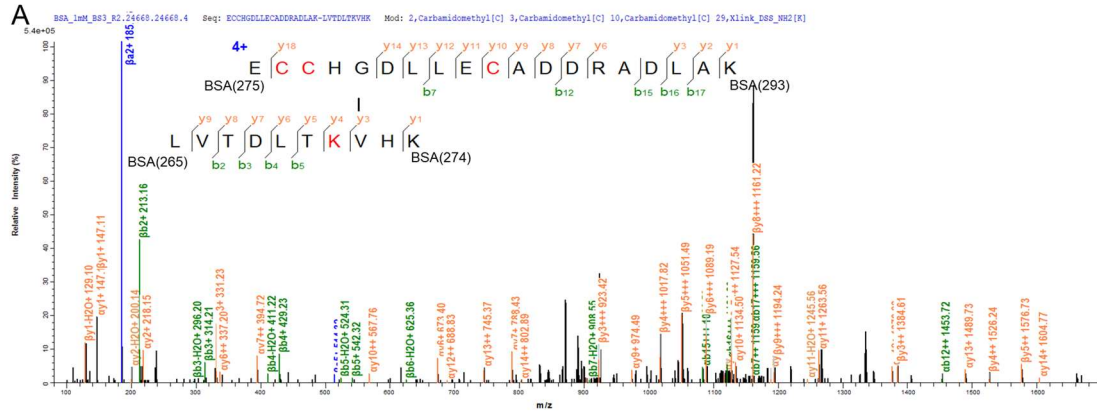

444

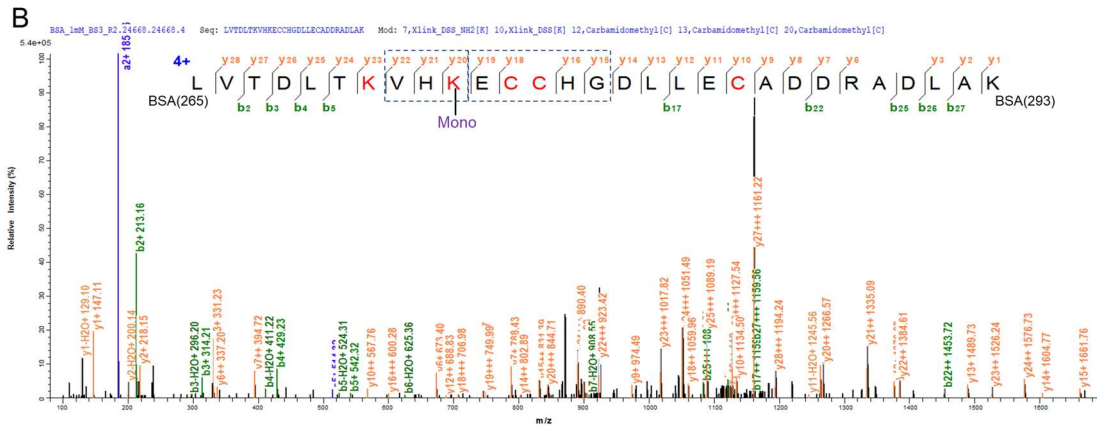

445

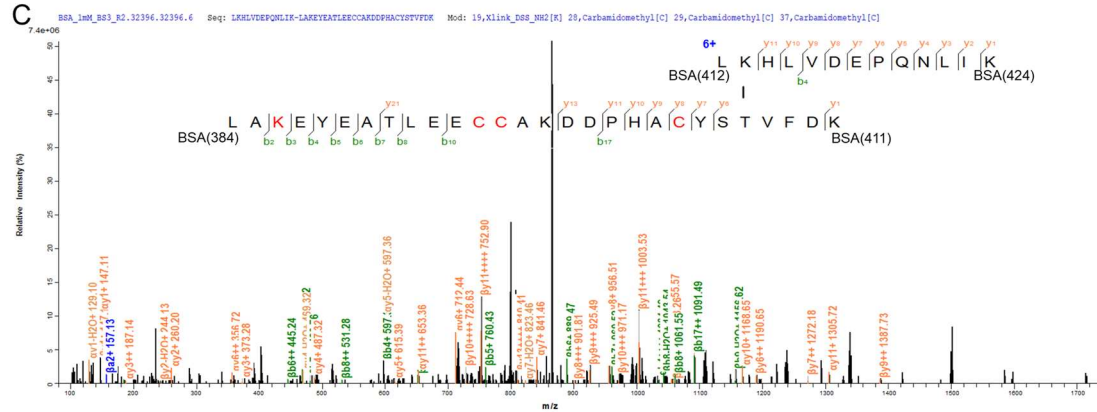

446

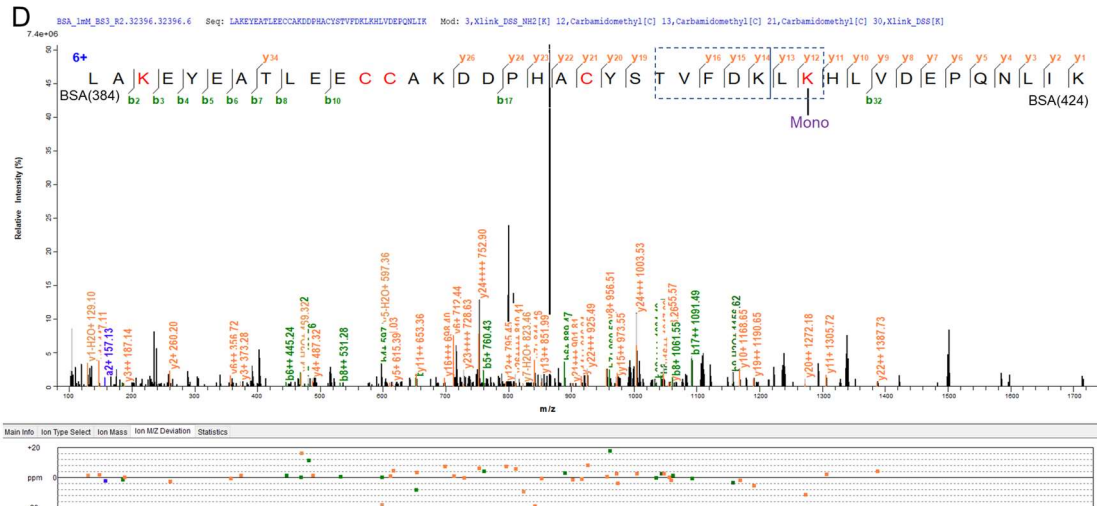

447

448 **Figure 7.** Two examples of K-mono-links misidentified as STY- or GVL-cross-links.  
 449 (A-B) The same spectrum annotated as a G-V cross-link (A) or as a K-mono-link (B).  
 450 (C-D) The same spectrum annotated as a K-T cross-link (C) or as a K-mono-link (D).

451

452 **An estimation of the contribution of different types of false identifications.**

453 In order to gauge the questionable cross-link identifications, we combined the STY-  
 454 cross-links of the five datasets (DSS-BSA, DSSO-BSA, DSBU-SurA/OmpA, DSSO-  
 455 Ribo, and DSS-Mpneu) and performed statistical analysis. xiSearch, MeroX and pLink  
 456 identified a total of 1764, 578, and 1634 STY-cross-links, respectively. We find that  
 457 62.3%, 16.8% and 15.1% of them have no cross-linkable K in the peptide sequences  
 458 (Supplementary Figure 5). For the rest, of the peptides having a link site on S, T, or Y,  
 459 50-75% have a cross-linkable K just 1-3 aa away from the reported link site. For these  
 460 peptides, it is quite possible that the K-link sites are misidentified as STY-link sites. As  
 461 the vast majority of STY-cross-links are K-STY cross-links, we estimate that close to  
 462 50-75% of the STY-crosslinks have a cross-linkable K 1-3 aa away from the reported  
 463 link site, which means that the percentage of K-K cross-links misidentified as STY  
 464 cross-links could be close to 18-64% of all STY-cross-links. This estimation is on par  
 465 with the percentage of STY-cross-links that have a K-K cross-link “isoforms”, i.e., of  
 466 the same two peptides with different link site(s) (Figure 8, segments marked by diamond  
 467 pattern). For the MeroX search results on BS<sup>3</sup>-BSA and DSSO-BSA, this is a major  
 468 source of misidentification, accounting for 57~66% of the STY-cross-links. MeroX  
 469 search results, however, have zero mono-links misidentified as STY-cross-links. For  
 470 xiSearch and pLink, >5% of their STY-cross-links identifications are better explained  
 471 as mono-links (Figure 8, slanted lines segments). On the DSS-Mpneu data, in particular,  
 472 61% of the STY-cross-links identified by xiSearch are misidentified mono-links.

473 Similar results were obtained when the GVL-cross-links were analyzed  
 474 (Supplementary Table 3-4).

475

476 For the other STY-cross-link identifications, a sizable portion contain no cross-linkable  
 477 K. Analysis of this subset finds that 18-30% of them have at least on short peptide of  
 478 5-7 aa (Supplementary Figure 6). As seen from the benchmark dataset of synthetic  
 479 peptides, the false, between-group cross-links have the same characteristic—about 50%  
 480 of them have short peptides, compared with ~30% for correct, within-group cross-links  
 481 (Figure 4G-I). Identification of a cross-link involves identifying the sequence of two  
 482 peptides and localizing link site in each. The above analysis shows that the three  
 483 mainstream cross-link search engines are generally good at the former, but not so good  
 484 at the latter task. Most, if not all, STY-cross-links are probably misidentifications and  
 485 many of them are actually K-K cross-links. We thus recommend against setting STY as  
 486 cross-linkable sites. A K-only cross-link search for NHS ester cross-linker increases  
 487 accuracy without costing structural information gained from the data. As shown in  
 488 Supplementary Table 1-2, if we ignore the difference in link sites, a K-only search and  
 489 a KSTY search identify almost exactly the same number of peptide pairs from the cross-  
 490 linked synthetic peptides (the number of identified mono-links in this standard dataset  
 491 is close to zero).

492

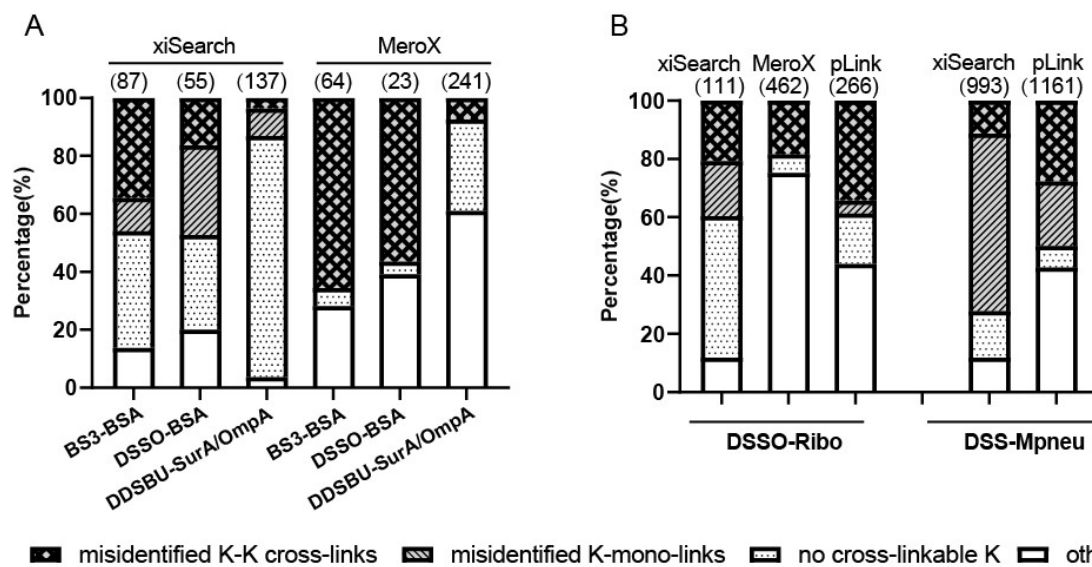

493

494 **Figure 8.** Summary of the origins of STY-cross-links. (A) low-complexity samples,  
 495 three different cross-linkers. (B) medium- and high-complexity samples.

496

497 **Discussion**

498 Whether STY should be added as cross-linkable sites for NHS ester cross-linkers has  
499 been controversial for a long time. Based on the analysis of multiple CXMS datasets  
500 representing different NHS ester cross-linkers and different laboratories, and more  
501 importantly, with GVL-cross-link identifications as a negative control, we show that  
502 STY-cross-links should be rare in conditions commonly used for CXMS experiments,  
503 i.e., 0.2-2.0 mM NHS ester cross-linker, 25 °C, 30-60 min for protein samples or up to  
504 2.5 h for peptide samples (Table I). Under such conditions, the STY- and GVL-cross-  
505 links identifications are not different in both the number and the quality score of CSMs.  
506 Therefore, most if not all STY-cross-link identification are unreliable. This is consistent  
507 with a recent finding that a pair of light/heavy isotope-labeled NHS ester probes did not  
508 label protein/ peptides at STY residue<sup>46</sup>. It is also supported by an earlier finding that  
509 at pH 6.7 and pH 7.8, no detectable reaction products were found between an NHS ester  
510 cross-linker and peptide hydroxyl groups of STY residues, even after 24 hours<sup>30</sup>.  
511 Therefore, setting STY as cross-linkable sites lacks justification from what is known  
512 about the chemical reactions of NHS esters in routine experimental settings.

513

514 So far, the evidence that supports STY-cross-links comes from incidents of good-  
515 looking spectral match. For example, Ryl et al. showed a well-matched spectrum to  
516 prove that serine could be cross-linked<sup>39</sup>. As we show in this study, although many  
517 GVL-cross-link identifications have poorly-matched spectra, some of them do have  
518 surprisingly good-looking spectra (Supplementary Figure 7B-C). This goes to show that  
519 an occasionally seen good match or two are insufficient evidence to prove that certain  
520 cross-links do occur. When the sequences of the two peptides are identified correctly,  
521 the appearance or disappearance of a tiny peak can shift the link site assignment from  
522 one residue to another (Supplementary Figure 4C-D). Without additional information,  
523 such as the knowledge of cross-linker specificity, precise localization of the link site  
524 needs contiguous fragment ions and the presence of isotopic peaks to validate their  
525 identities (charge state and monoisotopic  $m/z$ ).

526

527 The three categories of STY-cross-links—(I) misidentified K-K cross-links, (II)  
528 misidentified mono-links, and (III) no cross-linkable K—have different consequences  
529 on structural interpretation of the CXMS data. For K-K cross-links misidentified as  
530 STY-cross-links, the sequences of the two linked peptides are correctly identified, the  
531 link sites not. As such, the structural interpretation that a category I STY-cross-link will



532 lead to is not entirely wrong, but imprecise. For mono-links misidentified as STY-cross-  
533 links, they are not so informative to begin with because the two peptides are adjacent  
534 to each other in primary sequence of a protein. In other words, they have limited  
535 negative consequences. For the last category of STY-cross-links, 4.3-87.2% have no  
536 cross-linkable lysine residues and they tend to have a short peptide of  $\leq 7$  aa 1.5-30.7%,  
537 which is a feature shared by the confirmed false identifications in the grouped synthetic  
538 peptide dataset. This suggests that many of the category III STY-cross-links likely have  
539 incorrect peptide sequence identifications, let alone link-site assignment, they will  
540 surely mislead structural interpretation and cause more damage than the Category I and  
541 Category II cross-links.

542

543 Adding STY or GVL as cross-linkable sites increases the search space for  
544 peptide/cross-link-spectrum matching. Even if FDR is controlled at an acceptable level,  
545 the expanded base can lead to an increase in the number of falsely identified PSMs or  
546 CSMs. An examination of the cross-link search space, namely, the number of possible  
547 combinations of peptide pairs in a link-site-sensitive manner seems to agree with this  
548 idea. As shown in Figures 1-2 and Supplementary Figure 1, the search space (red  
549 squares. Y-axis on the right) of the nonK-nonK cross-links is often one-order of  
550 magnitude greater than that of K-K cross-links. A similar pattern is seen for mono-link  
551 search (Figure 3). Considering the large search space, the current cross-link search  
552 engines have done a good job of keeping out the vast majority of true negatives, namely,  
553 all GVL-cross-links and by the deduction above, most if not all STY-cross-links.

554

555 In summary, a weakness shared by the cross-link search engines has been found in this  
556 study. For a small but significant fraction of the CSMs that pass the filtering criteria,  
557 the link sites are not located precisely. This can become a serious problem when  
558 multiple amino acids are set as cross-linkable sites, and it is a great challenge to be  
559 faced by cross-link search engines when analyzing CXMS data of photoactivated cross-  
560 linkers, since they could theoretically react with any amino acid residues.

561

## 562 Acknowledgements

563 We thank Prof. Si-Min He and Prof. Hao Chi for their advice in experiment design and manuscript  
564 revision. The authors gratefully acknowledge financial support from the Ministry of Science and  
565 Technology of China (2020YFF01014505 to M.-Q.D.), the municipal government of Beijing (in the  
566 form of NIBS intramural grants), TIMBR, and Tsinghua University.

## 567 Author Contributions

568 M.-Q.D. devised the project. Y.C. and M.-Q.D. designed the experiments in this study. Y.C.  
569 performed the most data analysis. X.-T.L. performed partial data analysis of pLink. P.-Z.M.  
570 performed the <sup>15</sup>N-MS1 evaluation of identified cross-links of xiSearch, MeroX, and pLink. C.T.  
571 developed a unility to visualize the elution peak of cross-linked precursors. Y.C. and M.-Q.D. wrote  
572 the manuscript.

## 573 Note

574 The authors declare no competing financial interest.

575

## 576 Reference

- 577 1. Yang, B.; Wu, Y. J.; Zhu, M.; Fan, S. B.; Lin, J.; Zhang, K.; Li, S.; Chi, H.; Li, Y. X.; Chen, H. F.;  
578 Luo, S. K.; Ding, Y. H.; Wang, L. H.; Hao, Z.; Xiu, L. Y.; Chen, S.; Ye, K.; He, S. M.; Dong, M. Q.,  
579 Identification of cross-linked peptides from complex samples. *Nature methods* **2012**, *9* (9), 904-6.
- 580 2. Chen, Z. L.; Meng, J. M.; Cao, Y.; Yin, J. L.; Fang, R. Q.; Fan, S. B.; Liu, C.; Zeng, W. F.; Ding, Y.  
581 H.; Tan, D.; Wu, L.; Zhou, W. J.; Chi, H.; Sun, R. X.; Dong, M. Q.; He, S. M., A high-speed search engine  
582 pLink 2 with systematic evaluation for proteome-scale identification of cross-linked peptides. *Nat*  
583 *Commun* **2019**, *10* (1), 3404.
- 584 3. Liu, F.; Rijkers, D. T.; Post, H.; Heck, A. J., Proteome-wide profiling of protein assemblies by cross-  
585 linking mass spectrometry. *Nature methods* **2015**, *12* (12), 1179-84.
- 586 4. Liu, F.; Lossel, P.; Scheltema, R.; Viner, R.; Heck, A. J. R., Optimized fragmentation schemes and  
587 data analysis strategies for proteome-wide cross-link identification. *Nat Commun* **2017**, *8*, 15473.
- 588 5. Gotze, M.; Iacobucci, C.; Ihling, C. H.; Sinz, A., A Simple Cross-Linking/Mass Spectrometry  
589 Workflow for Studying System-wide Protein Interactions. *Anal Chem* **2019**.
- 590 6. Mendes, M. L.; Fischer, L.; Chen, Z. A.; Barbon, M.; O'Reilly, F. J.; Giese, S. H.; Bohlke-Schneider,  
591 M.; Belsom, A.; Dau, T.; Combe, C. W.; Graham, M.; Eisele, M. R.; Baumeister, W.; Speck, C.;  
592 Rappsilber, J., An integrated workflow for crosslinking mass spectrometry. *Mol Syst Biol* **2019**, *15* (9),  
593 e8994.
- 594 7. Giese, S. H.; Fischer, L.; Rappsilber, J., A Study into the Collision-induced Dissociation (CID)  
595 Behavior of Cross-Linked Peptides. *Mol Cell Proteomics* **2016**, *15* (3), 1094-104.
- 596 8. Wu, S.; Tutuncuoglu, B.; Yan, K.; Brown, H.; Zhang, Y.; Tan, D.; Gamalinda, M.; Yuan, Y.; Li, Z.;  
597 Jakovljevic, J.; Ma, C.; Lei, J.; Dong, M. Q.; Woolford, J. L., Jr.; Gao, N., Diverse roles of assembly  
598 factors revealed by structures of late nuclear pre-60S ribosomes. *Nature* **2016**, *534* (7605), 133-7.
- 599 9. Kim, S. J.; Fernandez-Martinez, J.; Nudelman, I.; Shi, Y.; Zhang, W.; Raveh, B.; Herricks, T.;  
600 Slaughter, B. D.; Hogan, J. A.; Upla, P.; Chemmama, I. E.; Pellarin, R.; Echeverria, I.; Shivaraju, M.;  
601 Chaudhury, A. S.; Wang, J.; Williams, R.; Unruh, J. R.; Greenberg, C. H.; Jacobs, E. Y.; Yu, Z.; de la

- 602 Cruz, M. J.; Mironska, R.; Stokes, D. L.; Aitchison, J. D.; Jarrold, M. F.; Gerton, J. L.; Ludtke, S. J.;  
603 Akey, C. W.; Chait, B. T.; Sali, A.; Rout, M. P., Integrative structure and functional anatomy of a nuclear  
604 pore complex. *Nature* **2018**, *555* (7697), 475-482.
- 605 10. Mei, K.; Li, Y.; Wang, S.; Shao, G.; Wang, J.; Ding, Y.; Luo, G.; Yue, P.; Liu, J. J.; Wang, X.; Dong,  
606 M. Q.; Wang, H. W.; Guo, W., Cryo-EM structure of the exocyst complex. *Nat Struct Mol Biol* **2018**, *25*  
607 (2), 139-146.
- 608 11. Ding, Y. H.; Gong, Z.; Dong, X.; Liu, K.; Liu, Z.; Liu, C.; He, S. M.; Dong, M. Q.; Tang, C.,  
609 Modeling Protein Excited-state Structures from "Over-length" Chemical Cross-links. *J Biol Chem* **2017**,  
610 *292* (4), 1187-1196.
- 611 12. Gong, Z.; Ding, Y. H.; Dong, X.; Liu, N.; Zhang, E. E.; Dong, M. Q.; Tang, C., Visualizing the  
612 Ensemble Structures of Protein Complexes Using Chemical Cross-Linking Coupled with Mass  
613 Spectrometry. *Biophys Rep* **2015**, *1*, 127-138.
- 614 13. Wang, J. H.; Tang, Y. L.; Gong, Z.; Jain, R.; Xiao, F.; Zhou, Y.; Tan, D.; Li, Q.; Huang, N.; Liu, S.  
615 Q.; Ye, K.; Tang, C.; Dong, M. Q.; Lei, X., Characterization of protein unfolding by fast cross-linking  
616 mass spectrometry using di-ortho-phthalaldehyde cross-linkers. *Nat Commun* **2022**, *13* (1), 1468.
- 617 14. Wheat, A.; Yu, C.; Wang, X.; Burke, A. M.; Chemmama, I. E.; Kaake, R. M.; Baker, P.; Rychnovsky,  
618 S. D.; Yang, J.; Huang, L., Protein interaction landscapes revealed by advanced in vivo cross-linking-  
619 mass spectrometry. *Proceedings of the National Academy of Sciences of the United States of America*  
620 **2021**, *118* (32).
- 621 15. O'Reilly, F. J.; Xue, L.; Graziadei, A.; Sinn, L.; Lenz, S.; Tegunov, D.; Blotz, C.; Singh, N.; Hagen,  
622 W. J. H.; Cramer, P.; Stulke, J.; Mahamid, J.; Rappsilber, J., In-cell architecture of an actively  
623 transcribing-translating expressome. *Science* **2020**, *369* (6503), 554-557.
- 624 16. Zhao, L.; Zhao, Q.; An, Y.; Gao, H.; Zhang, W.; Gong, Z.; Liu, X.; Zhao, B.; Liang, Z.; Tang, C.;  
625 Zhang, L.; Zhang, Y., Spatially resolved profiling of protein conformation and interactions by  
626 biocompatible chemical cross-linking in living cells. *bioRxiv* **2022**, 2022.01.20.476705.
- 627 17. Young, M. M.; Tang, N.; Hempel, J. C.; Oshiro, C. M.; Taylor, E. W.; Kuntz, I. D.; Gibson, B. W.;  
628 Dollinger, G., High throughput protein fold identification by using experimental constraints derived from  
629 intramolecular cross-links and mass spectrometry. *Proceedings of the National Academy of Sciences of*  
630 *the United States of America* **2000**, *97* (11), 5802-6.
- 631 18. Kao, A.; Chiu, C. L.; Vellucci, D.; Yang, Y.; Patel, V. R.; Guan, S.; Randall, A.; Baldi, P.;  
632 Rychnovsky, S. D.; Huang, L., Development of a novel cross-linking strategy for fast and accurate  
633 identification of cross-linked peptides of protein complexes. *Mol Cell Proteomics* **2011**, *10* (1), M110  
634 002212.
- 635 19. Muller, M. Q.; Dreiocker, F.; Ihling, C. H.; Schafer, M.; Sinz, A., Cleavable cross-linker for protein  
636 structure analysis: reliable identification of cross-linking products by tandem MS. *Anal Chem* **2010**, *82*  
637 (16), 6958-68.
- 638 20. Staros, J. V., N-hydroxysulfosuccinimide active esters: bis(N-hydroxysulfosuccinimide) esters of  
639 two dicarboxylic acids are hydrophilic, membrane-impermeant, protein cross-linkers. *Biochemistry* **1982**,  
640 *21* (17), 3950-5.
- 641 21. Tan, D.; Li, Q.; Zhang, M. J.; Liu, C.; Ma, C.; Zhang, P.; Ding, Y. H.; Fan, S. B.; Tao, L.; Yang, B.;  
642 Li, X.; Ma, S.; Liu, J.; Feng, B.; Liu, X.; Wang, H. W.; He, S. M.; Gao, N.; Ye, K.; Dong, M. Q.; Lei, X.,  
643 Trifunctional cross-linker for mapping protein-protein interaction networks and comparing protein  
644 conformational states. *Elife* **2016**, *5*.
- 645 22. Zhang, H.; Tang, X.; Munske, G. R.; Zakharova, N.; Yang, L.; Zheng, C.; Wolff, M. A.; Tolic, N.;

- 646 Anderson, G. A.; Shi, L.; Marshall, M. J.; Fredrickson, J. K.; Bruce, J. E., In vivo identification of the  
647 outer membrane protein OmcA-MtrC interaction network in *Shewanella oneidensis* MR-1 cells using  
648 novel hydrophobic chemical cross-linkers. *J Proteome Res* **2008**, *7* (4), 1712-20.
- 649 23. Jones, A. X.; Cao, Y.; Tang, Y. L.; Wang, J. H.; Ding, Y. H.; Tan, H.; Chen, Z. L.; Fang, R. Q.; Yin,  
650 J.; Chen, R. C.; Zhu, X.; She, Y.; Huang, N.; Shao, F.; Ye, K.; Sun, R. X.; He, S. M.; Lei, X.; Dong, M.  
651 Q., Improving mass spectrometry analysis of protein structures with arginine-selective chemical cross-  
652 linkers. *Nat Commun* **2019**, *10* (1), 3911.
- 653 24. Leitner, A.; Joachimiak, L. A.; Unverdorben, P.; Walzthoeni, T.; Frydman, J.; Forster, F.; Aebersold,  
654 R., Chemical cross-linking/mass spectrometry targeting acidic residues in proteins and protein  
655 complexes. *Proceedings of the National Academy of Sciences of the United States of America* **2014**, *111*  
656 (26), 9455-60.
- 657 25. Zhang, X.; Wang, J. H.; Tan, D.; Li, Q.; Li, M.; Gong, Z.; Tang, C.; Liu, Z.; Dong, M. Q.; Lei, X.,  
658 Carboxylate-Selective Chemical Cross-Linkers for Mass Spectrometric Analysis of Protein Structures.  
659 *Anal Chem* **2018**, *90* (2), 1195-1201.
- 660 26. Novak, P.; Kruppa, G. H., Intra-molecular cross-linking of acidic residues for protein structure  
661 studies. *Eur J Mass Spectrom (Chichester)* **2008**, *14* (6), 355-65.
- 662 27. Cui, L.; Ma, Y.; Li, M.; Wei, Z.; Huan, Y.; Li, H.; Fei, Q.; Zheng, L., Tyrosine-Reactive Cross-  
663 Linker for Probing Protein Three-Dimensional Structures. *Anal Chem* **2021**, *93* (10), 4434-4440.
- 664 28. Gutierrez, C. B.; Block, S. A.; Yu, C.; Soohoo, S. M.; Huszagh, A. S.; Rychnovsky, S. D.; Huang,  
665 L., Development of a Novel Sulfoxide-Containing MS-Cleavable Homobifunctional Cysteine-Reactive  
666 Cross-Linker for Studying Protein-Protein Interactions. *Anal Chem* **2018**, *90* (12), 7600-7607.
- 667 29. Steigenberger, B.; Albanese, P.; Heck, A. J. R.; Scheltema, R. A., To Cleave or Not To Cleave in  
668 XL-MS? *J Am Soc Mass Spectrom* **2020**, *31* (2), 196-206.
- 669 30. Madler, S.; Bich, C.; Touboul, D.; Zenobi, R., Chemical cross-linking with NHS esters: a systematic  
670 study on amino acid reactivities. *J Mass Spectrom* **2009**, *44* (5), 694-706.
- 671 31. Rinner, O.; Seebacher, J.; Walzthoeni, T.; Mueller, L. N.; Beck, M.; Schmidt, A.; Mueller, M.;  
672 Aebersold, R., Identification of cross-linked peptides from large sequence databases. *Nature methods*  
673 **2008**, *5* (4), 315-8.
- 674 32. Trnka, M. J.; Baker, P. R.; Robinson, P. J. J.; Burlingame, A. L.; Chalkley, R. J., Matching Cross-  
675 linked Peptide Spectra: Only as Good as the Worse Identification. *Mol Cell Proteomics* **2014**, *13* (2),  
676 420-434.
- 677 33. Hoopmann, M. R.; Zelter, A.; Johnson, R. S.; Riffle, M.; MacCoss, M. J.; Davis, T. N.; Moritz, R.  
678 L., Kojak: efficient analysis of chemically cross-linked protein complexes. *J Proteome Res* **2015**, *14* (5),  
679 2190-8.
- 680 34. Yilmaz, S.; Drepper, F.; Hulstaert, N.; Cernic, M.; Gevaert, K.; Economou, A.; Warscheid, B.;  
681 Martens, L.; Vandermarriere, E., Xilmass: A New Approach toward the Identification of Cross-Linked  
682 Peptides. *Anal Chem* **2016**, *88* (20), 9949-9957.
- 683 35. Lu, L.; Millikin, R. J.; Solntsev, S. K.; Rolfs, Z.; Scalf, M.; Shortreed, M. R.; Smith, L. M.,  
684 Identification of MS-Cleavable and Noncleavable Chemically Cross-Linked Peptides with  
685 MetaMorpheus. *J Proteome Res* **2018**, *17* (7), 2370-2376.
- 686 36. Dai, J.; Jiang, W.; Yu, F.; Yu, W., Xolik: finding cross-linked peptides with maximum paired scores  
687 in linear time. *Bioinformatics* **2019**, *35* (2), 251-257.
- 688 37. Yilmaz, S.; Busch, F.; Nagaraj, N.; Cox, J., Accurate and Automated High-Coverage Identification  
689 of Chemically Cross-Linked Peptides with MaxLynx. *Anal Chem* **2022**, *94* (3), 1608-1617.

- 690 38. Pirklbauer, G. J.; Stieger, C. E.; Matzinger, M.; Winkler, S.; Mechtler, K.; Dorfer, V., MS Annika:  
691 A New Cross-Linking Search Engine. *J Proteome Res* **2021**, *20* (5), 2560-2569.
- 692 39. Ryl, P. S. J.; Bohlke-Schneider, M.; Lenz, S.; Fischer, L.; Budzinski, L.; Stuiver, M.; Mendes, M.  
693 M. L.; Sinn, L.; O'Reilly, F. J.; Rappsilber, J., In Situ Structural Restraints from Cross-Linking Mass  
694 Spectrometry in Human Mitochondria. *J Proteome Res* **2020**, *19* (1), 327-336.
- 695 40. Marx, D. C.; Plummer, A. M.; Faustino, A. M.; Devlin, T.; Roskopf, M. A.; Leblanc, M. J.; Lessen,  
696 H. J.; Amann, B. T.; Fleming, P. J.; Krueger, S.; Fried, S. D.; Fleming, K. G., SurA is a cryptically grooved  
697 chaperone that expands unfolded outer membrane proteins. *Proceedings of the National Academy of*  
698 *Sciences of the United States of America* **2020**, *117* (45), 28026-28035.
- 699 41. Stieger, C. E.; Doppler, P.; Mechtler, K., Optimized Fragmentation Improves the Identification of  
700 Peptides Cross-Linked by MS-Cleavable Reagents. *J Proteome Res* **2019**, *18* (3), 1363-1370.
- 701 42. Beveridge, R.; Stadlmann, J.; Penninger, J. M.; Mechtler, K., A synthetic peptide library for  
702 benchmarking crosslinking-mass spectrometry search engines for proteins and protein complexes. *Nat*  
703 *Commun* **2020**, *11* (1), 742.
- 704 43. Hardman, G.; Perkins, S.; Brownridge, P. J.; Clarke, C. J.; Byrne, D. P.; Campbell, A. E.;  
705 Kalyuzhnyy, A.; Myall, A.; Eyers, P. A.; Jones, A. R.; Eyers, C. E., Strong anion exchange-mediated  
706 phosphoproteomics reveals extensive human non-canonical phosphorylation. *EMBO J* **2019**, *38* (21),  
707 e100847.
- 708 44. Chi, H.; Liu, C.; Yang, H.; Zeng, W. F.; Wu, L.; Zhou, W. J.; Wang, R. M.; Niu, X. N.; Ding, Y. H.;  
709 Zhang, Y.; Wang, Z. W.; Chen, Z. L.; Sun, R. X.; Liu, T.; Tan, G. M.; Dong, M. Q.; Xu, P.; Zhang, P. H.;  
710 He, S. M., Comprehensive identification of peptides in tandem mass spectra using an efficient open  
711 search engine. *Nat Biotechnol* **2018**.
- 712 45. An, Z.; Zhai, L.; Ying, W.; Qian, X.; Gong, F.; Tan, M.; Fu, Y., PTMiner: Localization and Quality  
713 Control of Protein Modifications Detected in an Open Search and Its Application to Comprehensive Post-  
714 translational Modification Characterization in Human Proteome. *Mol Cell Proteomics* **2019**, *18* (2), 391-  
715 405.
- 716 46. He, J. X.; Fei, Z. C.; Fu, L.; Tian, C. P.; He, F. C.; Chi, H.; Yang, J., A modification-centric  
717 assessment tool for the performance of chemoproteomic probes. *Nat Chem Biol* **2022**, *18* (8), 904-912.
- 718 47. Harrison, A. G.; Csizmadia, I. G.; Tang, T. H.; Tu, Y. P., Reaction competition in the fragmentation  
719 of protonated dipeptides. *J Mass Spectrom* **2000**, *35* (6), 683-8.
- 720 48. Iacobucci, C.; Sinz, A., To Be or Not to Be? Five Guidelines to Avoid Misassignments in Cross-  
721 Linking/Mass Spectrometry. *Anal Chem* **2017**, *89* (15), 7832-7835.
- 722
